# Supplementary material
Source: Springer Nature journal article supplement (https://www.springermedizin.de/resource/supplementary/12885_2007_1107_MOESM3_ESM.pdf/9471134)

Pre-treatment CT scan

Post-treatment CT scan

A

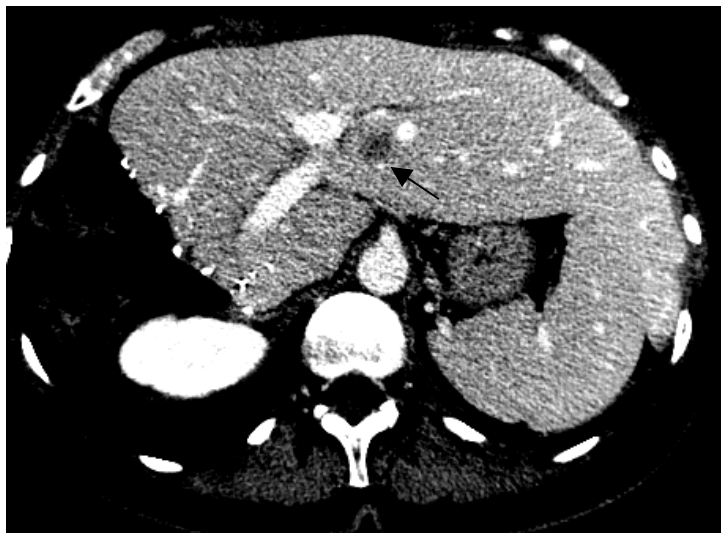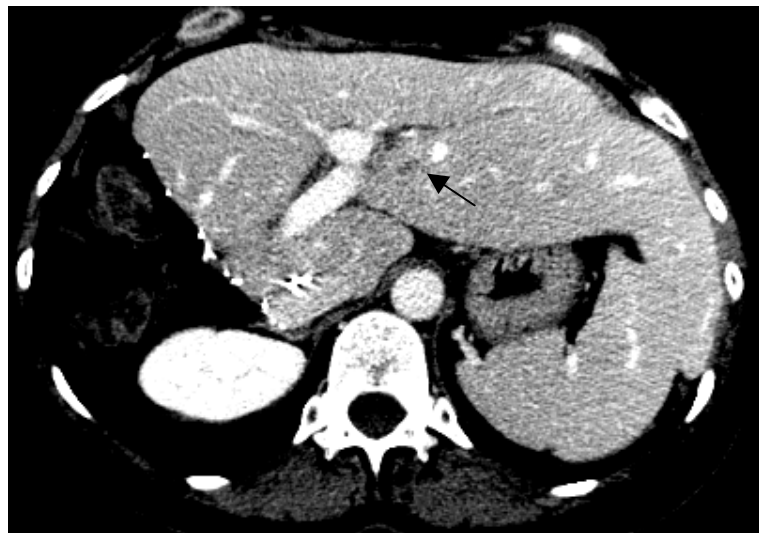

B

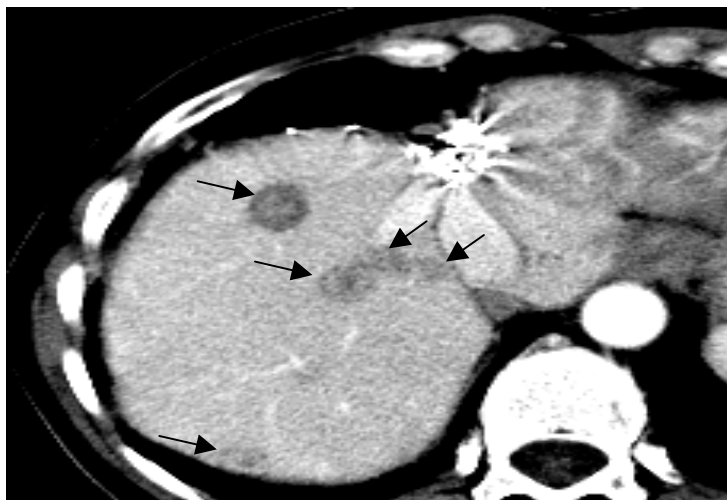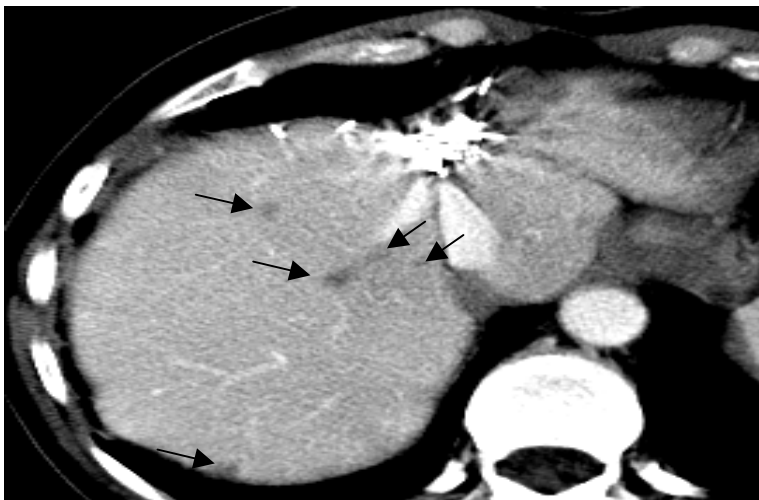

Supplement: MOESM3 [file 9471134]
